# Supplementary material for: First evaluation of the GEMS formaldehyde product against TROPOMI and ground-based column measurements during the in-orbit test period
Source: Copernicus journal article supplement (doi:10.5194/acp-24-4733-2024), 2024-04-19
Supplement: Supplementary file 1 [file acp-24-4733-2024-supplement.pdf]

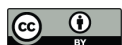

*Supplement of*

## **First evaluation of the GEMS formaldehyde product against TROPOMI and ground-based column measurements during the in-orbit test period**

**Gitaek T. Lee et al.**

*Correspondence to:* Rokjin J. Park ([rjpark@snu.ac.kr](mailto:rjpark@snu.ac.kr)) and Hyeong-Ahn Kwon ([hakwon@suwon.ac.kr](mailto:hakwon@suwon.ac.kr))

The copyright of individual parts of the supplement might differ from the article licence.

**Table S1. Summary of the data field variables archived in the GEMS Level 2 HCHO product. Layer, spatial, and image represent the number of vertical layers of the a priori profile, cross-track, and along-track of the GEMS observation, respectively.**

| Variable name         | Description                                                                                    | Unit                       | Dimensions              |
|-----------------------|------------------------------------------------------------------------------------------------|----------------------------|-------------------------|
| AirMassFactor         | AMF                                                                                            | unitless                   | spatial × image         |
| ClearAirMassFactor    | AMF (cloud-free condition)                                                                     | unitless                   | spatial × image         |
| AMFCloudFraction      | Cloud radiance fraction                                                                        | unitless                   | spatial × image         |
| AMFCloudPressure      | Cloud top pressure                                                                             | hPa                        | spatial × image         |
| AMFDiagnostic         | Diagnostic flags in AMF calculation                                                            | unitless                   | spatial × image         |
| AMFSurfaceLER         | Surface Lambertian-equivalent reflectivity                                                     | unitless                   | spatial × image         |
| ColumnAmount          | HCHO VCD                                                                                       | molecules cm <sup>-2</sup> | spatial × image         |
| ColumnUncertainty     | Random uncertainty of the HCHO VCD                                                             | molecules cm <sup>-2</sup> | spatial × image         |
| dSCD                  | Retrieved SCD before background correction                                                     | molecules cm <sup>-2</sup> | spatial × image         |
| FitConvergenceFlag    | Degree of convergence of the spectral fitting determined by the fitting score of the HCHO dSCD | unitless                   | spatial × image         |
| FittingRMS            | Fitting root mean square error                                                                 | unitless                   | spatial × image         |
| GasProfile            | HCHO a priori profile                                                                          | molecules cm <sup>-3</sup> | layer × spatial × image |
| Layer                 | Pressure profile                                                                               | hPa                        | layer × spatial × image |
| ScatteringWeight      | Scattering weight                                                                              | unitless                   | spatial × image         |
| ClearScatteringWeight | Scattering weight (cloud-free condition)                                                       | unitless                   | spatial × image         |
| FinalAlgorithmFlags   | Final algorithm flags                                                                          | unitless                   | spatial × image         |

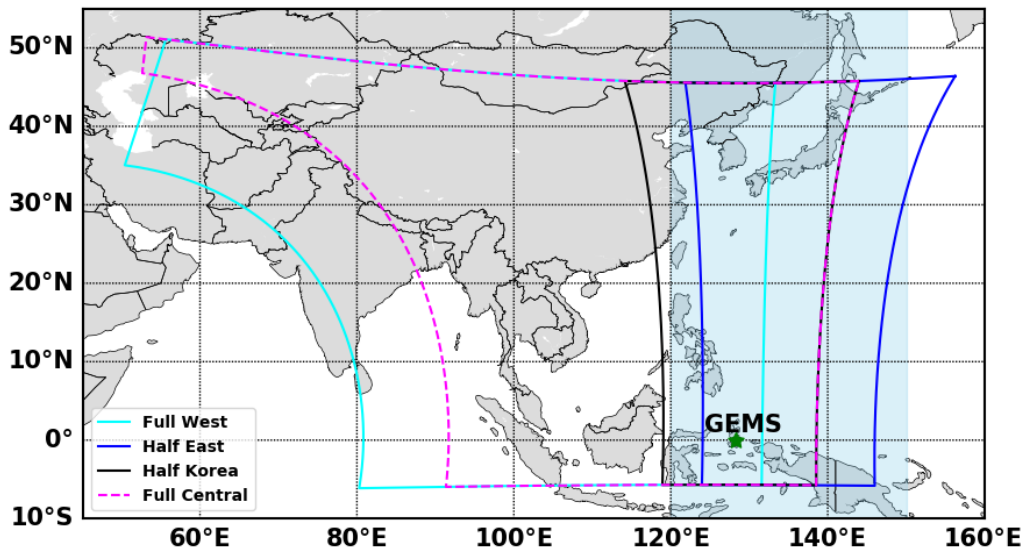

Fig. S1. Operational scan domain of GEMS (adapted from Kwon et al., 2019): half eastern scan (blue), half Korea scan (black), full central scan (dashed magenta), full western scan (cyan), and the GEMS location (green star). Shaded areas (120–150° E) represent regions for radiance references and the common mode.

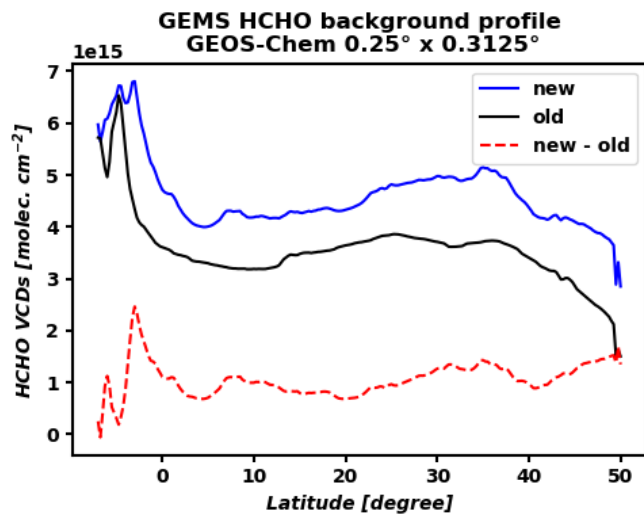

Fig. S2. Simulated annual mean HCHO background VCDs according to the reference sector (new: 120–150° E, old: 143–150° E).

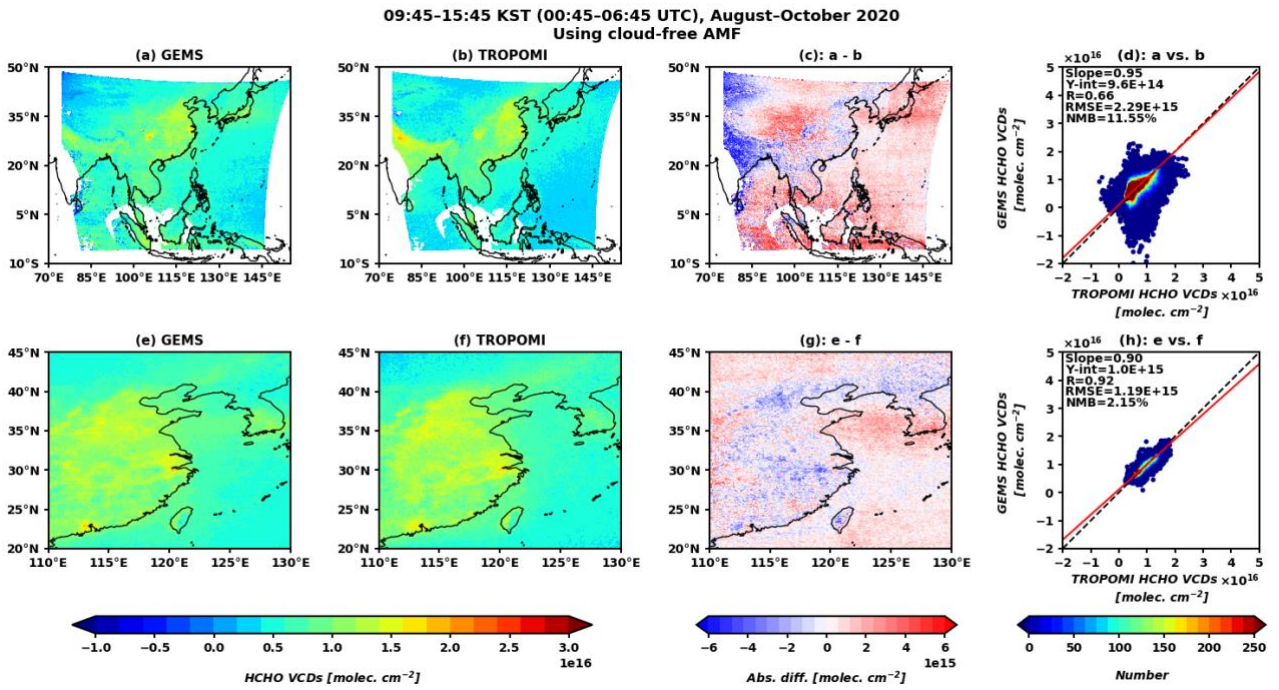

Fig. S3. Same as for Fig. 9 except for the AMF computation under the cloud-free assumption.

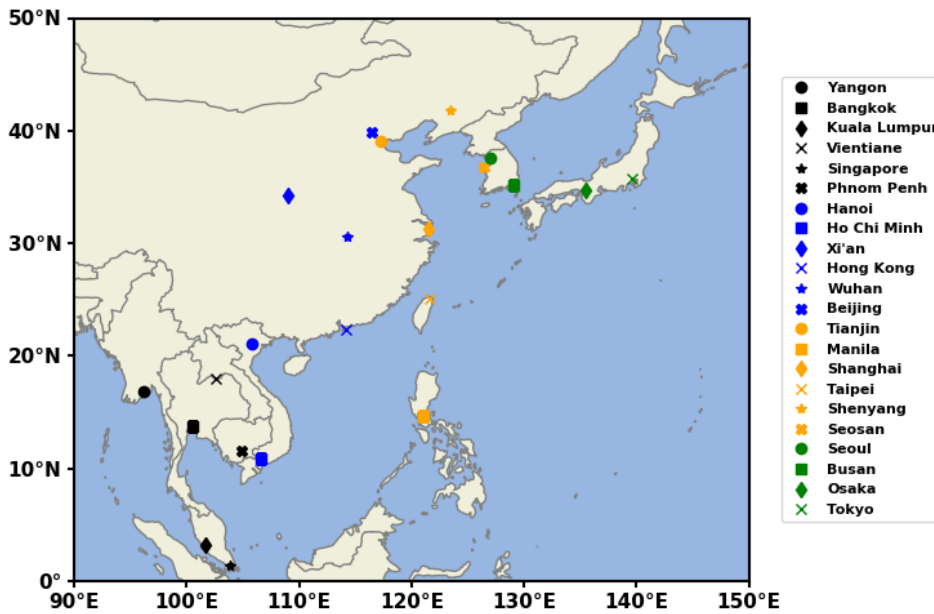

Fig. S4. Regions selected for the comparison between GEMS and TROPOMI.

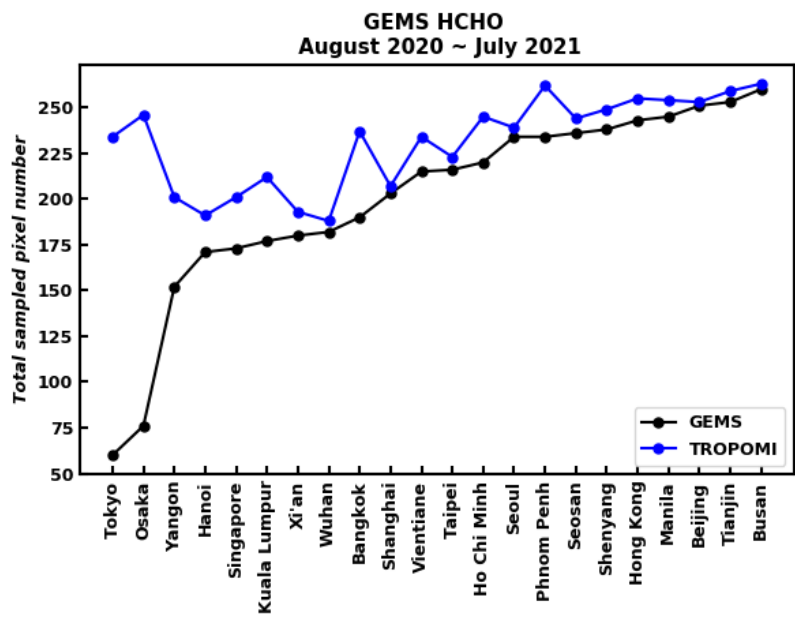

Fig. S5. Total sampled pixels of GEMS and TROPOMI HCHO VCDs by the regions presented in Fig. 10 during the TROPOMI overpass time from August 2020 to July 2021.

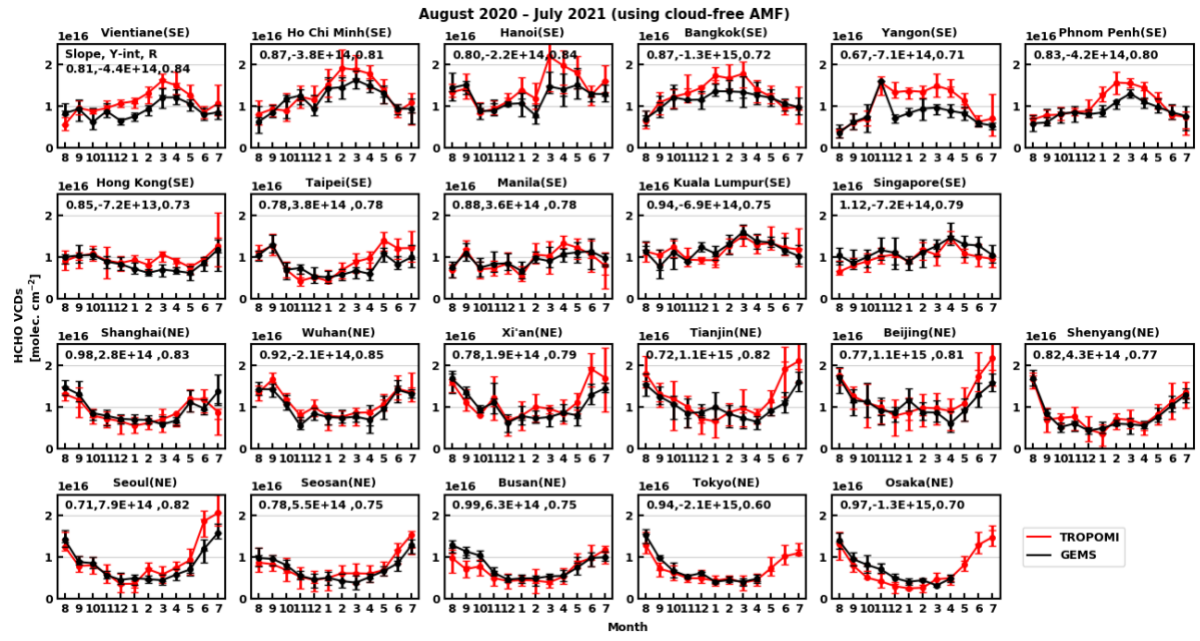

Fig. S6. Same as for Fig. 10 except for the AMF computation under the cloud-free assumption.

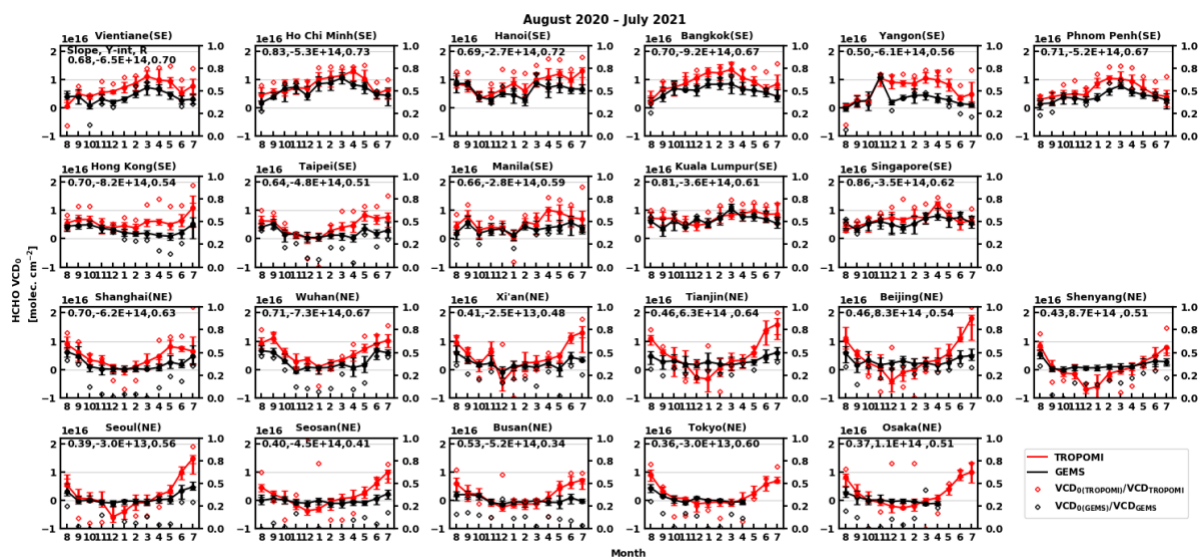

Fig. S7. Same as for Fig. 10 except for  $VCD_0$  (VCDs without background contributions). Diamonds represent an absolute value of  $VCD_0/VCD$ .

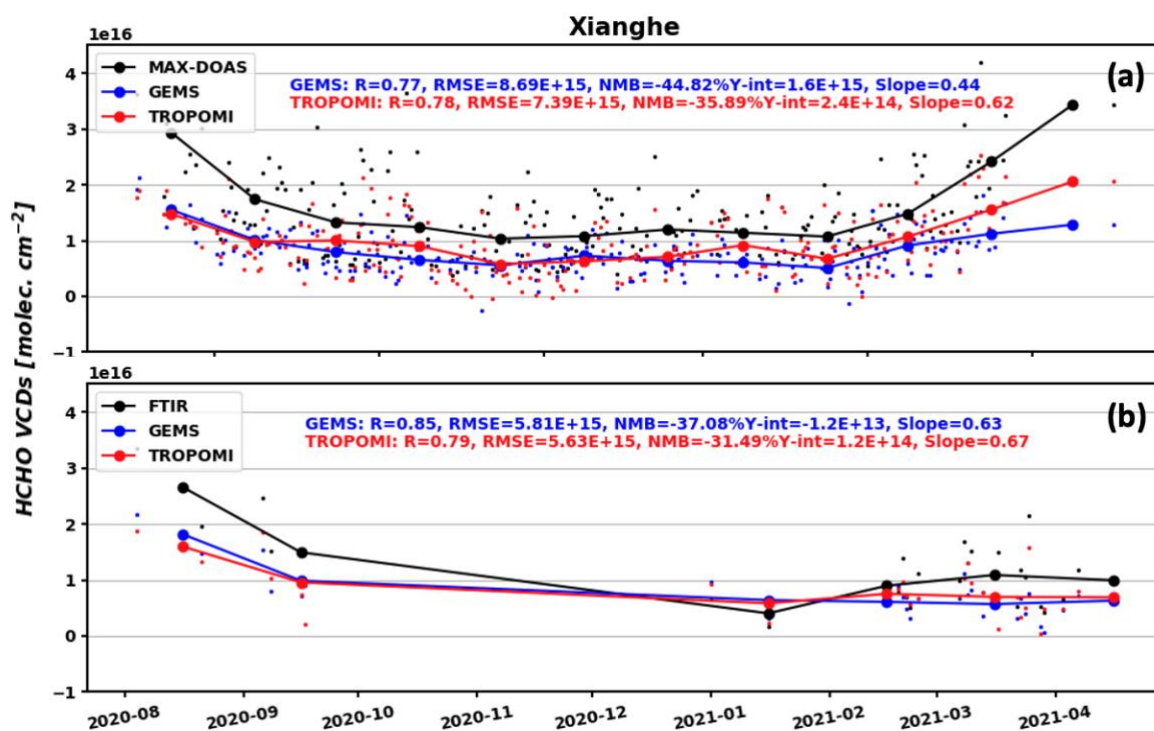

Fig. S8. Time series of daily (small marker) and monthly (large marker with solid line) mean vertical columns for GEMS (blue) and TROPOMI (red) against (a) MAX-DOAS (black) and (b) FTIR (black) for the TROPOMI overpass time (13:30, local time). GEMS and TROPOMI HCHO VCDs were directly compared with MAX-DOAS and FTIR without averaging kernel smoothing and a priori substitution.

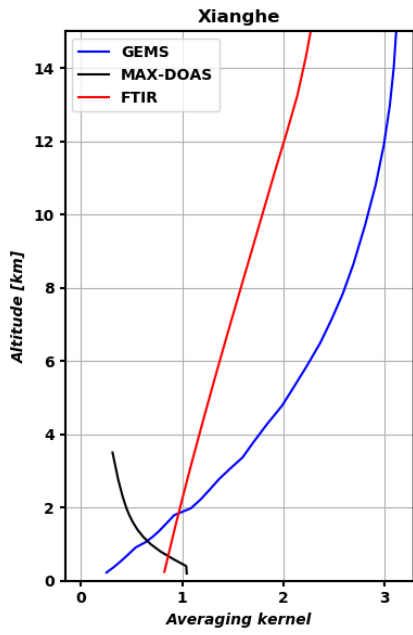

Fig. S9. Daily mean averaging kernels of GEMS (blue), MAX-DOAS (black), and FTIR (red) on 3 August 2020.

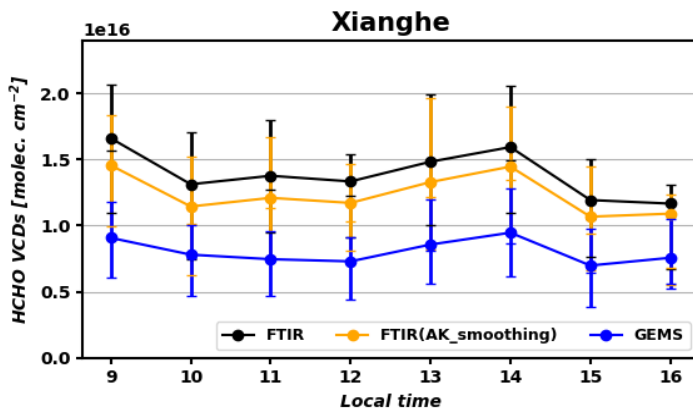

Fig. S10. Same as for Fig. 12 except for the FTIR observation.

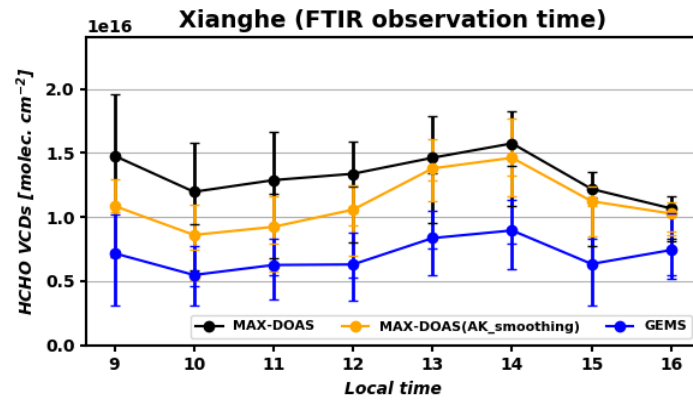

Fig. S11. Same as for Fig. 12 except for the MAX-DOAS HCHO in the FTIR observation time.

## Xianghe

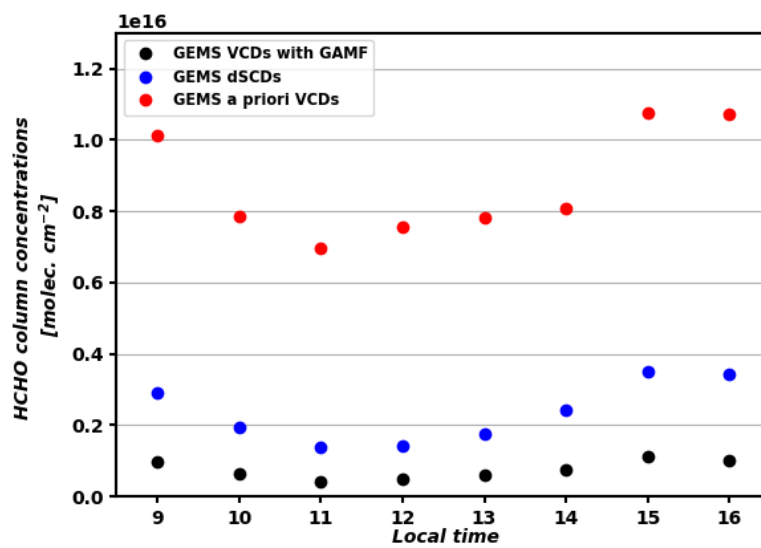

Fig. S12. Diurnal variations of median HCHO column concentrations from August 2020 to July 2021 in Xianghe: GEMS VCDs using geometric AMF (GAMF) without background corrections (black), GEMS dSCDs (blue), and model VCDs from GEMS a priori profiles (red).
